# Supplementary material
Source: PubMed Central journal article supplement (PMC7164768)
Supplement: NIHMS1556485-supplement-SupInfo.pdf [file NIHMS1556485-supplement-SupInfo.pdf]

## Supplementary Material

### *Supplementary discussion*

#### **Possible mechanisms for the propagation of conformational changes during the nucleotide hydrolysis cycle**

We postulate that, during the transition from the ATP to the ADP state, both NBDs rotate outwards and towards the membrane. Because the PPXD is fixed by its interaction with the SecY channel, this could result in the transient widening of the clamp of SecA. The movement of the NBDs would also be propagated by the long helix of the HSD to the two-helix finger. In one scenario, the NBDs would maintain their interactions with the long helix of the HSD, resulting in its bending. This could change the tilt of the associated two-helix finger, such that its tip would move away from the SecY pore. An alternative possibility is that the interactions of the long helix of the HSD with the NBD1 are broken, perhaps by association of the NBD1 with a non-translocating SecY copy. In this case, the long helix would serve as a lever arm with a pivot point on the 2b/3 loop of SecY, and this could move the finger away from the SecY pore.

*Supplementary figures*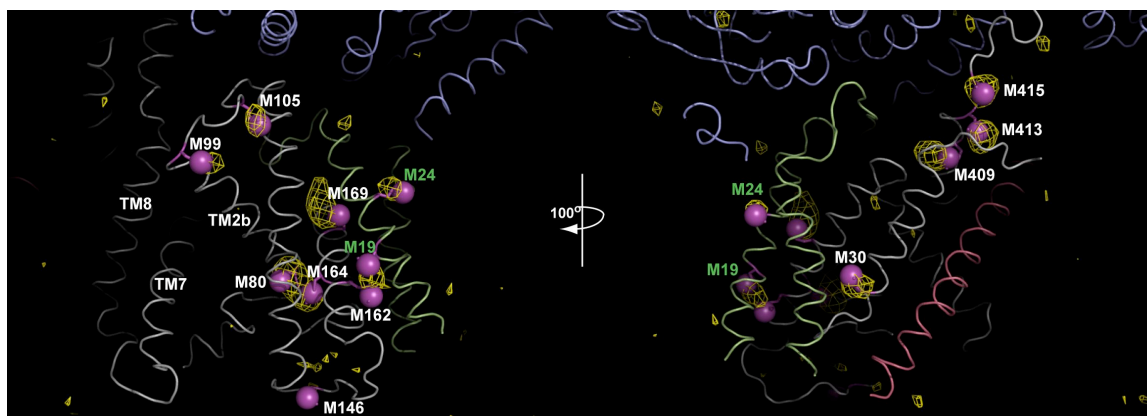

**Figure S1| Position of the seleno-methionine residues in *T. maritima* SecYEG.** The positions of 11 out of 13 Se-Met in SecY and SecG were identified in an anomalous Fourier difference map shown at  $3.2\sigma$  contour level (yellow mesh). The positions for Se-Met 162 of SecY and 19 of SecG could not be assigned unambiguously. The sulfur atoms of all 13 Met residues of the SecYEG channel are shown as spheres in magenta. SecA is shown in blue, SecY in gray, SecE in red, and SecG in green.

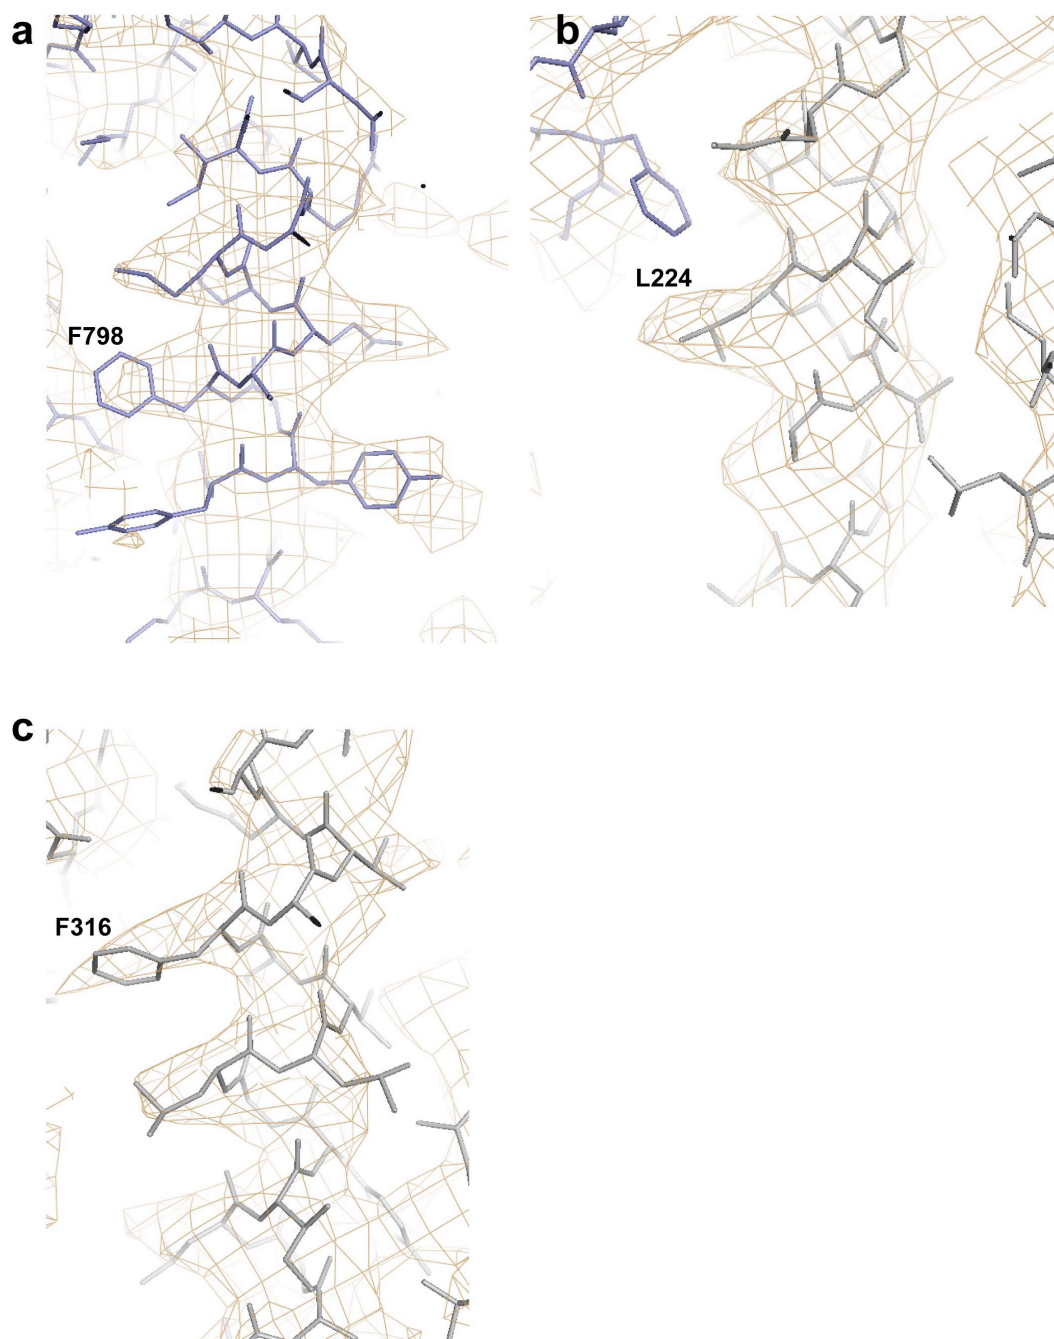

**Figure S2| Selected views of the electron density map.** Shown are  $\sigma_A$ -weighted, phase combined, NCS averaged, and B-factor sharpened ( $-100$ )  $2F_oF_c$  electron density maps (brown mesh, contoured at  $1\sigma$ ). SecA is shown in blue and SecY in gray. **a**, Helix 2 of SecA's two helix finger inside the cytoplasmic funnel of SecY. **b** and **c**, TM6 and TM9 of SecY. Phe798 of SecA and Leu224 and Phe316 of SecY are labeled for orientation.

## SecA

```

E_coli      1  MLIKLLTKVFGSRNDRTLRRMRKVVNIINAMEPEMEKLSDEELKGTAEFRARLEKGEVL
B_subtilis 1  -MLGILNKMFD P-TKRTLNRYEKIANDIDAIRGDYBNLSDDALKHKTI EFKERLEKGGATT
T_maritima 1  -----MILFDK-NKRILKKYAKMVSKINQIESDLRSKKNSELIRLSMVLKQVNSFEDA

E_coli      61  ENLIPEAFVAVREASKRVFGMRHFDVQLLGGMVLNERCI AEMRTGEGKTLTATLPAYLNA
B_subtilis 59  DDLLEAFVAVREASRRVTGMFPFKVQLMGGVALHDGNIAEMKTGEGKTLTSTLPVYLNA
T_maritima 54  DEHLFEAFALVREAAARRTLGMRPFVDVQVMGGIALHEGKVAEMKTGEGKTLAATMPIYLNNA

E_coli      121  LTGKGVHVVTVNDYLAQRDAENNRPLFEFLGLTVGIN-----
B_subtilis 119  LTGKGVHVVTVNEYLASRD AEQMGKI FEFLGLTVGLN-----
T_maritima 114  LIGKGVHLVTVNDYLARRDALWMPVYVFLGLRVGVINSLGKSYEVVWKNPDLARKAIEE

E_coli      158  -----LPGMPAPA-----KREAYAADITYGTNNEYGFDYLRDN
B_subtilis 156  -----LNSMSKDE-----KREAYAADITYSTNNELGFDYLRDN
T_maritima 174  NWSVWPDGFGNGEVLKEE SMNKEAVEAFQVELKEITRKEAYLCDVTYGTNNEFGFDYLRDN

E_coli      191  MAFSPEERVQRKLHYALVDEVDSILIDEARTPLIISGPAEDSSEMYKRVNKIIPH LIRQE
B_subtilis 189  MVLYKEQMVQRPLHFAVIDEVDSILIDEARTPLIISGQAAKSTKLYVQANAFV R-----
T_maritima 234  LVLDYNDKQVQRGHFYAIVDEADSVLIDEARTPLIISGPSKESPSVYRFAQTAK-----

E_coli      251  KEDSETFQGEHFSVDEKSRQVNLTERGLVLI EELLVKEGIMDEGESLYSPANIMLMHHV
B_subtilis 243  -----TLKAEKDYTYDIKTKAVQLTEEGMTKAEKAFGID-----NLFVVKHVALNHHI
T_maritima 288  -----KFVKDKDFTVDEKARTIILTEEGVAKAEKIIIGVE-----NLYDPPGNVSLLYHL

E_coli      311  TAALRAHALFTRDVDYIVKDG EVIIVDEHTGRM QGRRWSDGLHQAVEAKEGVQIQNENQ
B_subtilis 291  NQALKAHVAMQKDVYVVEDGQVIVDSFTGR LMKGRRYSEGLHQAI EAKEGLEIQNESM
T_maritima 336  INALKALHLFKKDVYVVMNGEVIIVDEFTGR LIPGRRYSGGLHQAI EAKEGVPIKEESI

E_coli      371  TLASITFQNYFRLYEKL AGMTGTADTEAFEFSS IYKLDTVVVP TNRPMIRKDL PDLVYMT
B_subtilis 351  TLATITFQNYFRMYEKL AGMTGTAKTEEEFRNI YNQVV TIPTNRP VVRDDR PDLIYRT
T_maritima 396  TYATITFQNYFRMYEKL AGMTGTAKTEESEFVQV YGMEVVVIPT HKPMIRKDHDDL VFR T

E_coli      431  EAEKIQAIIEDIKERTAKGQPVLVGTISIEKSELVSNELTKAGIKHNVLNAK F HANEAAI
B_subtilis 411  MEGKFKAVAE DV AQRYMTGQPVLVGTVA VETSELSKLLKNKGI PHQVLNAKNHBEREAQI
T_maritima 456  QKEKYEKIVEEIEKRYKKGQPVLVGTTSIEKSEL LSSMLKKKGI PHQVLNAKYHEKAEAI

E_coli      491  VAQAGYPAAVTIATNMAGR GTDIVLGGSWQAEVA ALENPTAEQIEKIKADWQVRHDAVLE
B_subtilis 471  IEEAGQKGA VTIATNMAGR GTDIKLG-----EGVKE
T_maritima 516  VAKAGQKGMVTIATNMAGR GTDIKLG-----PGVAE

E_coli      551  AGGLHIIGTERHESRRIDNQLRGRSGRQGDAGSSRFYLSMEDALMRI FASDRVSGMMRKL
B_subtilis 502  LGGLAVVGTERHESRRIDNQLRGRSGRQGD PGI TQFYLSMEDEL MRRFGAERTMAMLDRF
T_maritima 547  LGGLCIIGTERHESRRIDNQLRGRAGRQGD PGE SIFFLSLED DDLRIFGSEQIGKVMNII

E_coli      611  GMKPGEAIEHPWVTKAIANAQRKVESRNFDIRKQLLEYDDVANDQRRAIYSQRNELLDVS
B_subtilis 562  GMDDSTPIQSKMVSRAV ESSQKRVEGN NFD SRKQLLQYDDVLRQQREV IYKQRFVIDSE
T_maritima 607  KIEEGQPIQH PMLSKLIENIQKKVEGINF S IRKTLME MDDVLDKQRRAVYSLRDQILLEK

E_coli      671  DVSETINSIREDFVKATIDAYIP PQSLEEMWDI PGLQERLKNDFDLD--LP IAEWLDKEP
B_subtilis 622  NLREIVENMIKSSLERAI AAYTPREELPEEWKLDGLVDLINTTYLDEGALEKSDIFGKEP
T_maritima 667  DYDEY LKDI F EDVVSTRVEEFCSGK---NWDI E SLKNSLS--FFPAGLFDLDEKQFSSS

E_coli      729  ELHEETLREIRILAQSIEVYQRKEEVVGAEMMRHFEKGVMLQTLDSLWKEHLAAMDYLRQG
B_subtilis 682  ----DEMLELIMDRITIKYNEKEEQFGKEQMR EFKVIVLRAVDSKWM DHDIDAMDQLRQG
T_maritima 721  ----EELHDYLFNRLWIEYQRKQEI G-EDYRKVIRFLMLR IIDDHWRRYLEEVEHVKEA

E_coli      789  IHLRGYAQKDPKQ EYKRESFSMFAAMLESIKYEVISTLSKVQVRMP EEELEQQRMEA
B_subtilis 738  IHLRAYAQTNP LREYQMEGFAMFEHMI ESIEDEVAKFVMKAEI ENNLEREEVVQG-----
T_maritima 776  VQLRSYQKDP IVEFKKETYYMFDEMMRR INDTIANVYVLRV VVKVSEKDEK EAKEELG---

E_coli      849  ERLAQMQLSHQDDDSAAAAALAAQTGERK VGRNDPCPCGSGKKYKQCHGR LQ
B_subtilis 793  ----QTTAHQPQEGDDNKKAKKAPVRKVVD IGRNAPCHCGSGKKYKNCCGRTE
T_maritima 833  ----KIRLVHEEFNLVNRAMRRATEKKK---KKDGLHSFGRI RVKR-----

```

Figure S3| Sequence alignment of the SecAs from *E. coli*, *B. subtilis* and *T. maritima*.

The C-termini of the truncated SecA constructs used in this study are indicated by a red bar.



SecY

```

E_coli          1  ---MAKQPGLDFQSAKGGLGLELKRRLLFVIGALIVFRIGSFIPIPGIDAAVLAKLL-EQ
M_jannaschii   1  MKKLIPILEKIPEVELPVKEITFKKKLKWTGIVLVLYFIMGCIDVYTAGAQI-----
T_maritima     1  -----MWQAFKNAFKIPELRDRIIFTFLALIVFRMGIYIPVPGLNLEAWGEIFRRRI
E_coli          56  --QR--GTIIEMFNMFSGGALSRSIFALGIMPYISASIIIQLLTVVHPTLAEIKKEEGES
M_jannaschii   53  -----PAIFEFWQTITASRI--GTLITLGIGPIVTAGIIMQLLVG--SGIIQMDLSIPE
T_maritima     52  AETAGVAGILSFYDVFTGGALSRFSVFTMSVTPYITASIILQLLASVMPSLKEMLREGEE
E_coli          112  GRRKISQYTRYGTLVLAIFQSIGIATG--LPNMPGMQGLVINPGFAYFTAVVSLVTGTM
M_jannaschii   103  NRALFQGCQKLLSIIMCFVEAVLFGAG----AFGILTP----LLAFLVIIQIAFGSI
T_maritima     112  GRRKFAKYTRRLTLLLIGFQAFFVSFS-LARSNPDMVAPGVN-VLQFTVLSTMSLAGTM
E_coli          170  FLMWLGEQITERGIGNGISIIFAGIVAGLPPAIAH-----TIEQARQGDLHFLVLL
M_jannaschii   153  ILIYLDEIVSKYGIGSGIGLFIAAGVSQTFVGALGPEGYLWKFLNSLIQG-VPNIEYIA
T_maritima     170  FLLWLGERITEKGIGNGISILIFAGIVARYPSYIRQ-----AYLGLNLEWIF
E_coli          223  VAVLVFAVTFFVVFVERGQRRIVVNYAKRQQGRRVYAAQSTHLPLKVNMAGVIPAFASS
M_jannaschii   212  PIIGTIIVFLMVVYAECMRVEIPLAHGR-----IKGAVGKYPIKFVYVSNIPVILAAA
T_maritima     219  LIAVALITIFGIILVQQAERRITIQYARRVTGRRVYGGASTYLPIKVNQGGVPIIFASA
E_coli          283  ILLFPATIASWFGGGTG-----WNWLTTISLYLQ-----PGQPLYVLLYA
M_jannaschii   265  LFANIQLWGLALYRMGIPLGHYEGGRAVDGIAYYLSTPYLSSVISDPIHAIVYMIAMI
T_maritima     279  IVSIPSAIAS-ITNNE-----TLK---NLFR-----AGGFLYLLIYG
E_coli          323  SAIIFFCFFYTALV-FNPRETADNLKKSGAFVPGIRPGEQTAKYIDKVMTRRLTLVGALYI
M_jannaschii   325  ITCVMFGIFWVETTGLDPKSMAKRIGSLGMAIKGFRKSE---KAIEHRLKRYIPPLTVMS
T_maritima     312  LLVFFFTYFYSVVI-FDPREISENIRKYGYIPGLRPGRSTEQYLHRVLNRVIFIGAVFL
E_coli          382  TFICLIPEFMRDAMKVP-FYFGGTSLLIVVVVIMDFMAQVQTLMMSSQYESALKKANLKG
M_jannaschii   382  SAFVGFLATIANFIGALG--GGTGVLLTVSIVYRMYEQLLREK-VSELHPAIAKLLNK-
T_maritima     371  VVIALLPYLVQGAIKVN-VWIGGSALIAVGVALDIIQQMETHMVRHYEGFIKKGKIRG
E_coli          441  YGR
M_jannaschii   ---
T_maritima     430  RR-

```

Figure S4| Sequence alignment of the SecYs from *E. coli*, *M. jannaschii* and *T. maritima*. TM-helices are indicated by gray bars, and regions not modeled in our crystal structure are indicated by red dashed lines.

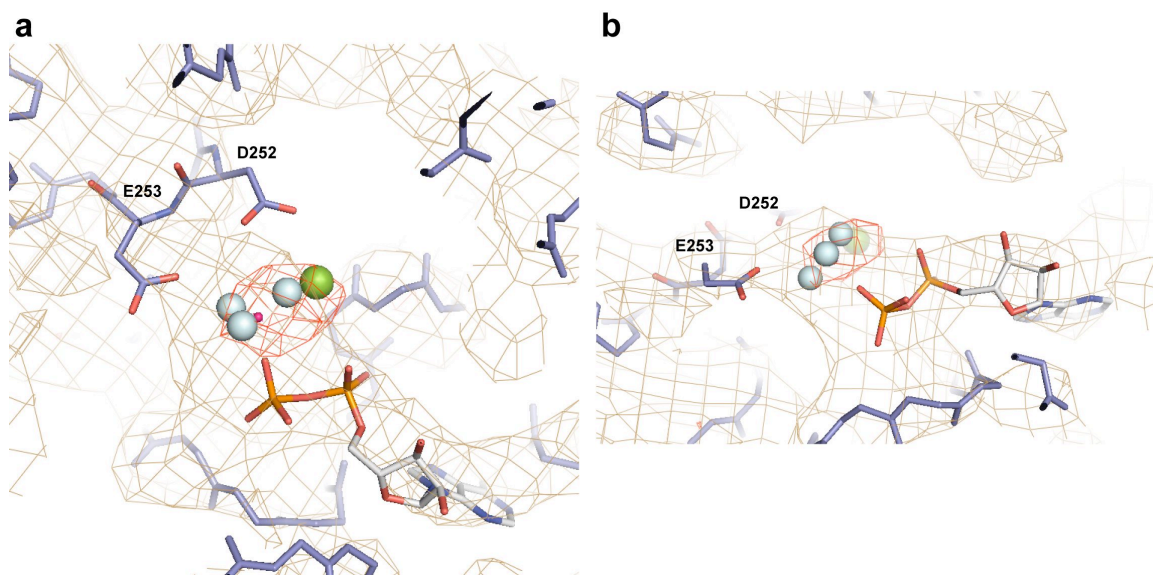

**Figure S5| The ADP-BeFx complex in the nucleotide binding pocket of SecA.** **a**, A  $\sigma_A$ -weighted, phase combined, NCS averaged, and B-factor sharpened (-50) 2FoFc electron density map (brown mesh, contoured at  $1.2\sigma$ ). The model phases were calculated with only ADP in the nucleotide-binding pocket and were also used to calculate a FoFc difference map (red mesh, contoured at  $4.5\sigma$ ). The modeled  $Mg^{2+}/BeF_3^-$  complex is shown in spheres (green magnesium, blue fluorine, pink beryllium). **b**, as in **a**, but side view of the ADP- $BeF_3^-$  complex. Asp252 and Glu253 in the DEAD box of SecA are labeled for orientation.

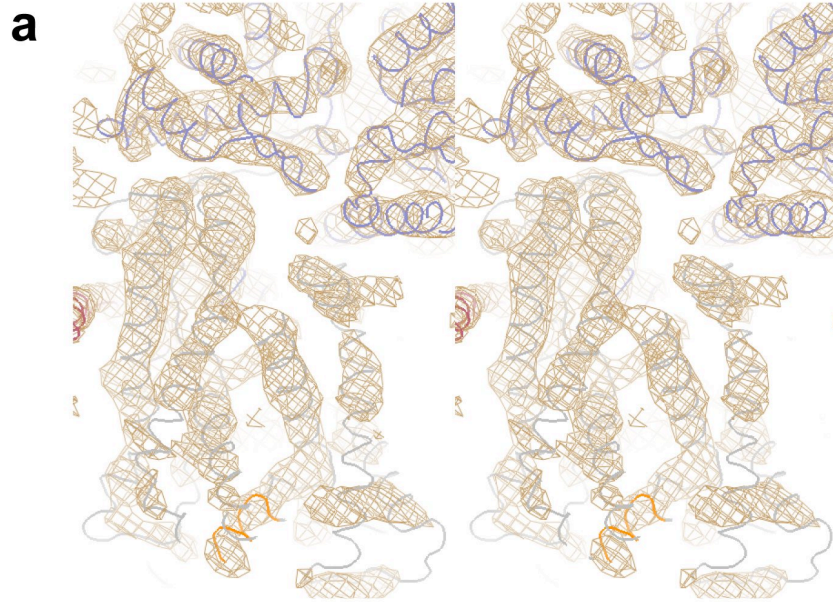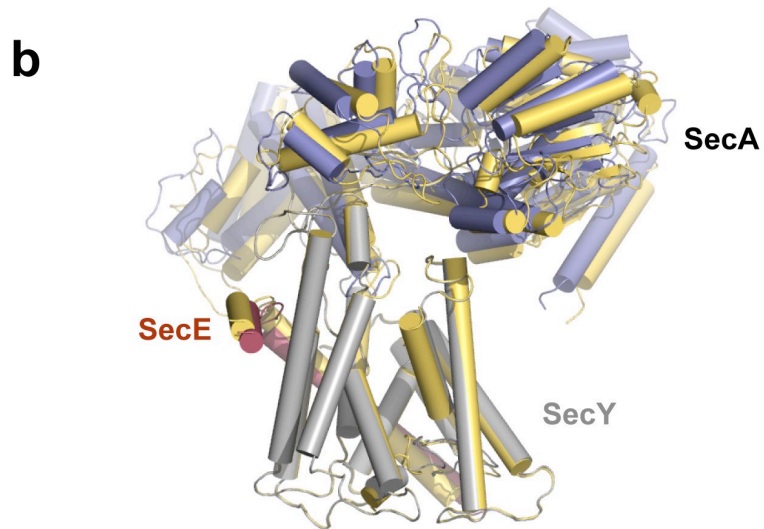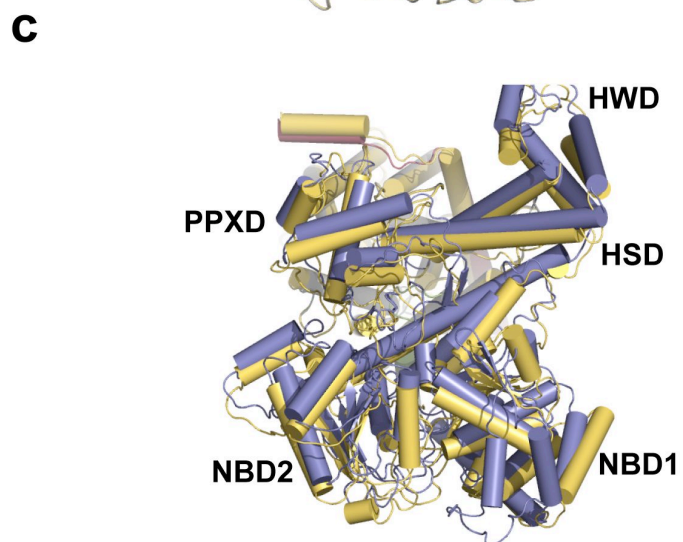

**Figure S6| Comparison of the *B. subtilis* SecA – *T. maritima* SecYE and *T. maritima* SecA-SecYEG complexes.** **a**, Stereo view of a  $\sigma^A$ -weighted, 4-fold averaged, solvent-flattened 2FoFc electron density map of the *B. subtilis* SecA - *T. maritima* SecYE complex. The view is on the lateral gate of SecY. SecY is shown in gray, the plug domain in orange, and SecA in blue. **b**, Side view of an alignment of the complex of *B. subtilis* SecA and *T. maritima* SecYE (both components in yellow) with the complex of *T. maritima* SecA and *T. maritima* SecYEG (SecA in blue, SecY in gray, SecE in red, SecG omitted). The complexes were aligned with respect to the SecY channel. **c**, Top view of the aligned complexes.



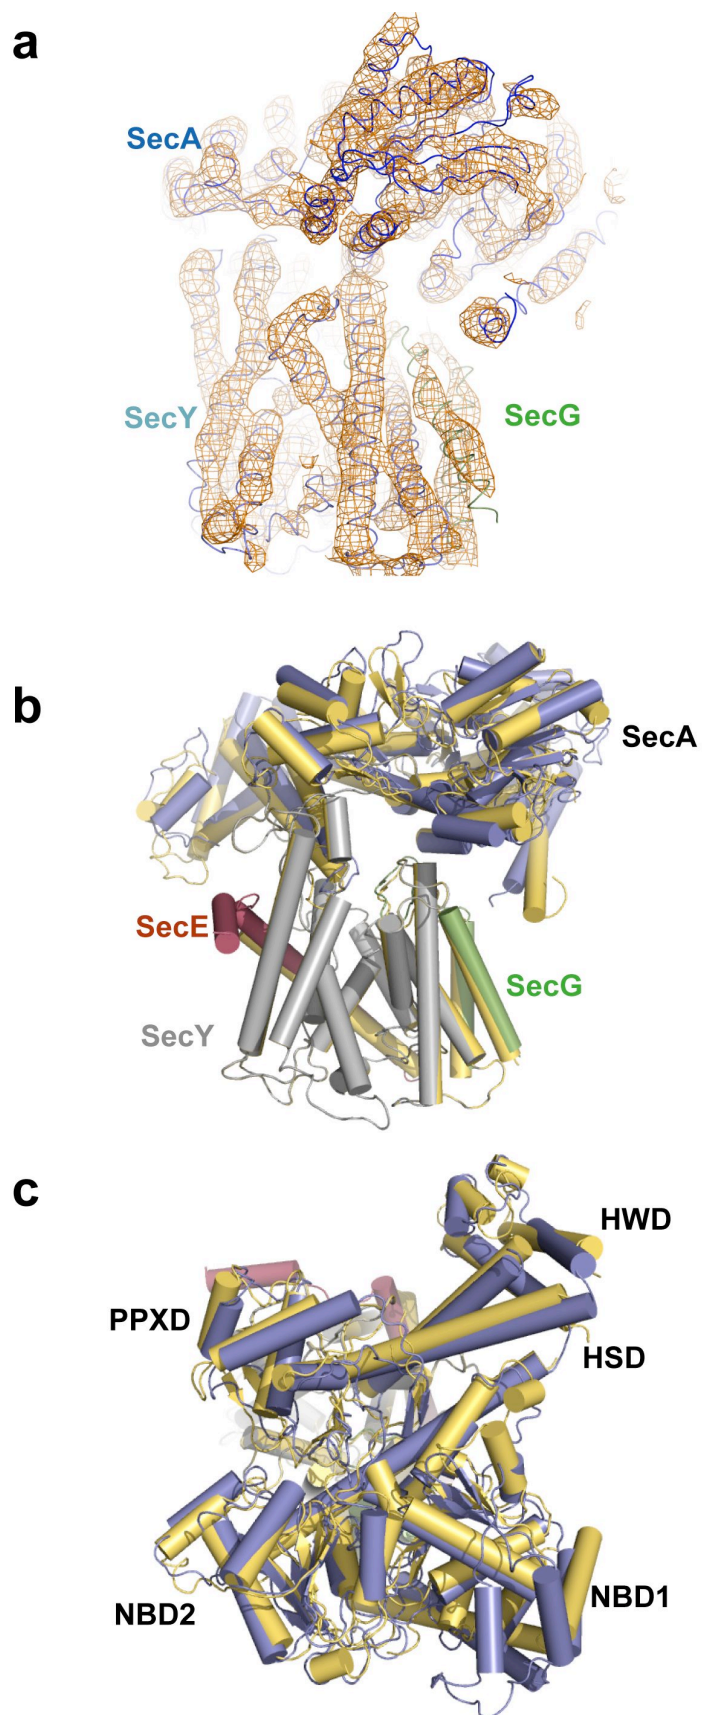

**Figure S7| Comparison of the *B. subtilis* SecA – *A. aeolicus* SecYEG and *T. maritima* SecA-SecYEG complexes.** **a**, Shown is a NCS averaged 2FoFc electron density map of the *B. subtilis* SecA - *A. aeolicus* SecYEG complex. The view is on the lateral gate of SecY. SecY is shown in light blue, SecG in green, SecE in red, and SecA in blue. **b**, Side view of an alignment of the complex of *B. subtilis* SecA and *A. aeolicus* SecYEG (both components in yellow) with the complex of *T. maritima* SecA and *T. maritima* SecYEG (SecA in blue, SecY in gray, SecE in red, SecG green). The complexes were aligned with respect to the SecY channel. **c**, Top view of the aligned complexes.

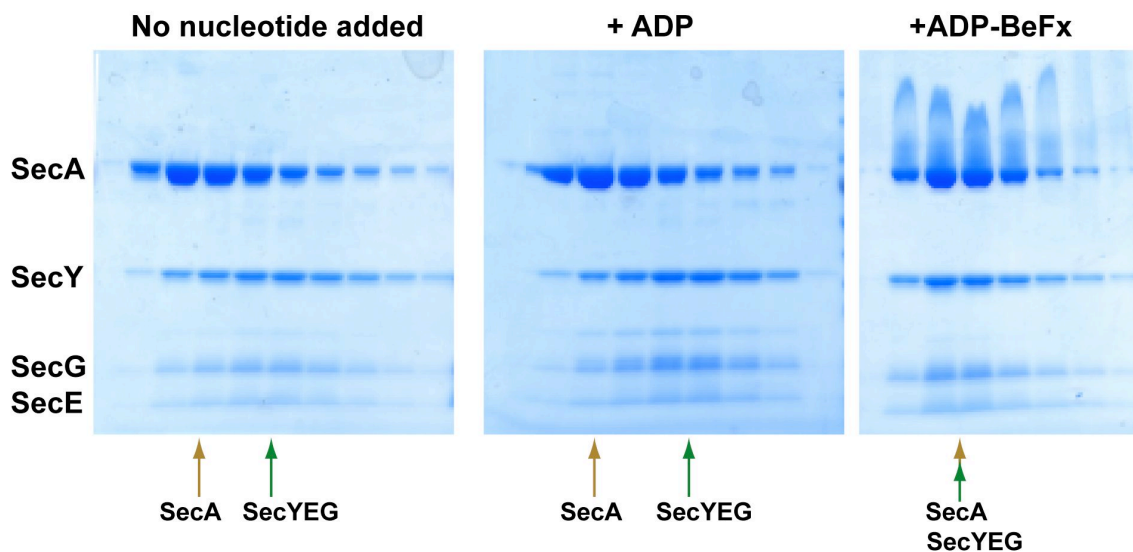

**Figure S8| Nucleotide dependence of the stability of a SecA-SecY complex.** SecA from *B. subtilis* and SecYEG from *A. aeolicus* were gel-filtered in the absence of nucleotide or in the presence of ADP or ADP-BeFx in 20mM MES pH 6.5, 150mM NaCl, 10% glycerol, 0.5mM Cymal-6, 10mM MgCl<sub>2</sub> ( $\pm$  1mM ADP, 2mM BeCl<sub>2</sub>, and 7mM NaF). Samples of the fractions were analyzed by SDS-PAGE and stained with Coomassie blue. The “smearing” of SecA in the presence of ADP and BeFx is likely due to an increased SDS resistance of SecA and disappears upon boiling of the samples in SDS prior to electrophoresis. The arrows indicate the peak positions of SecA and SecY.

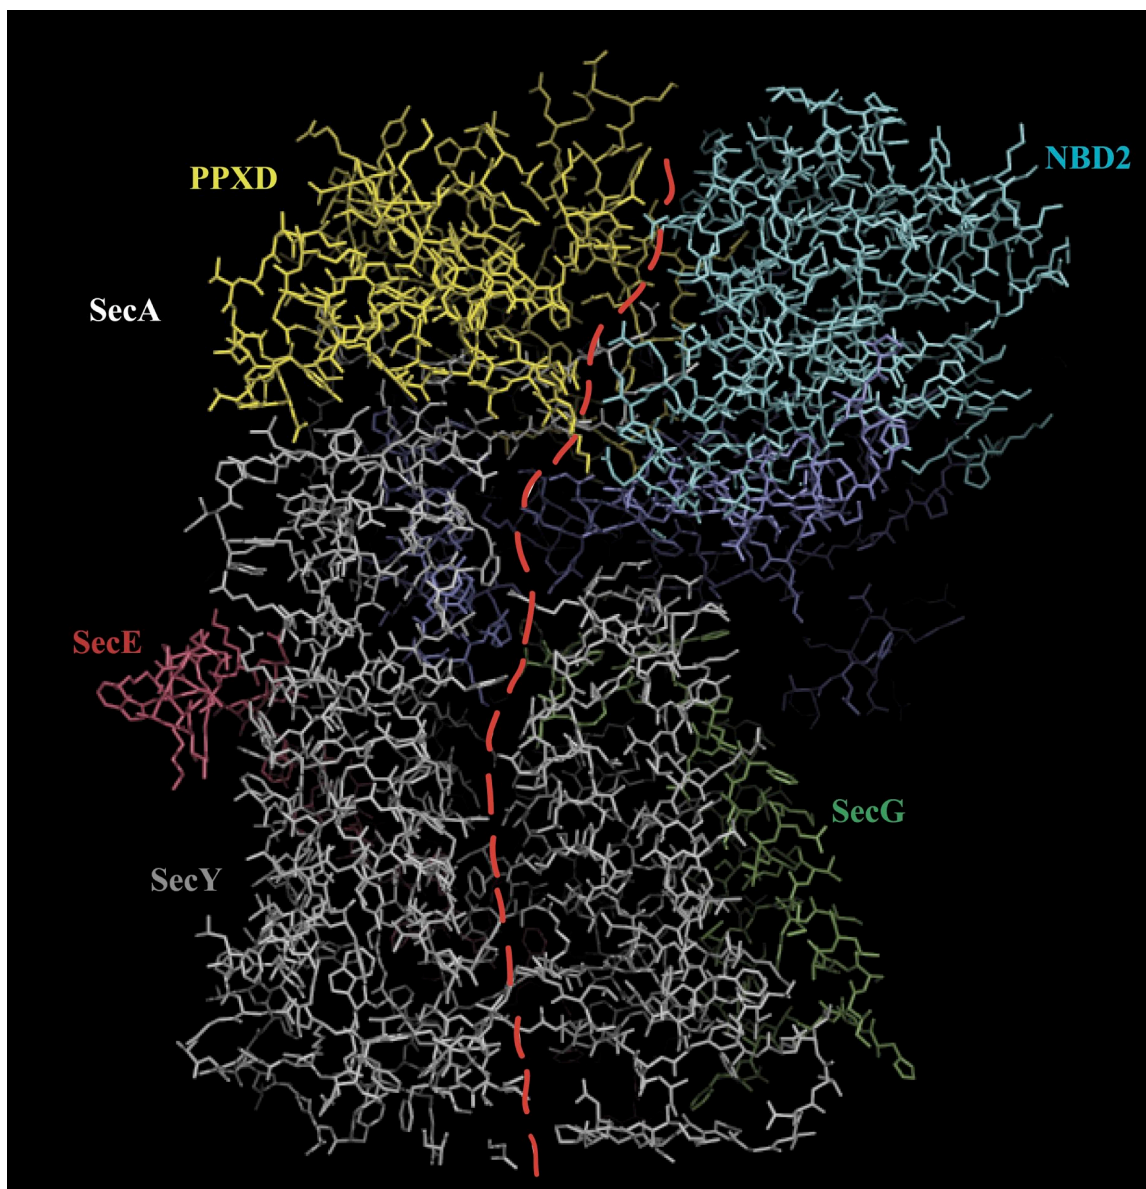

**Figure S9| Alignment of the mouth of the SecA clamp with the lateral gate of the SecY channel.** The seam on the surface of the SecA-SecYEG complex is indicated by a dashed red line. The polypeptide chains are colored as in Figure 1.

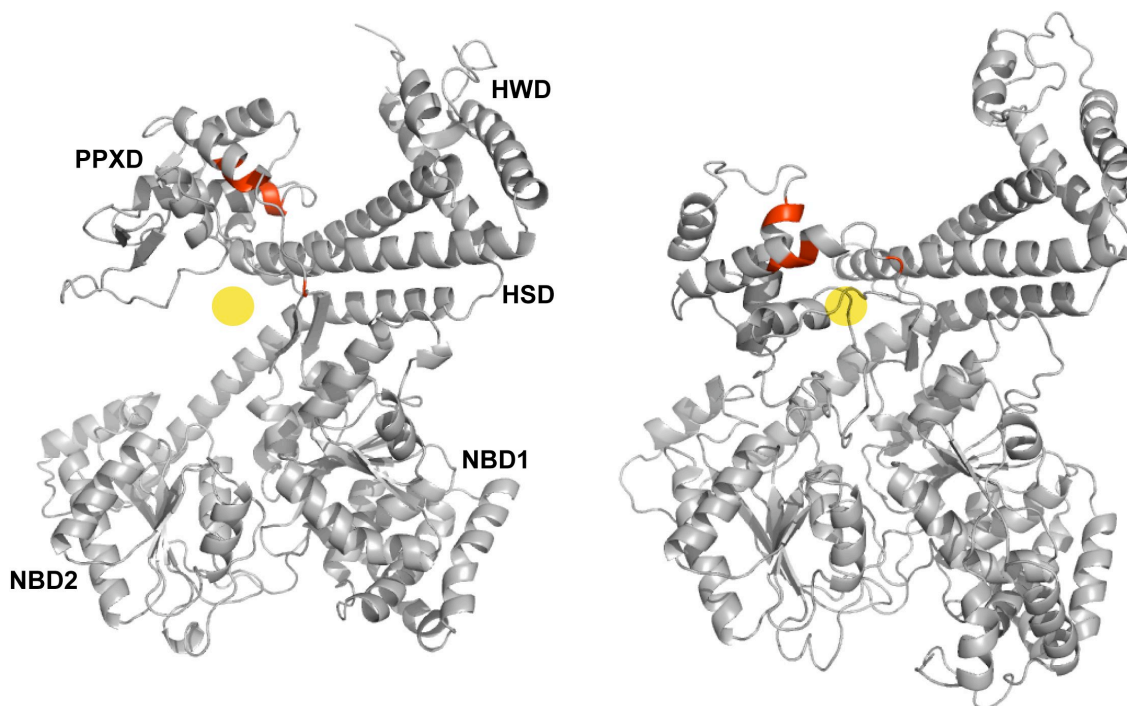

**Figure S10| Signal peptide binding site of SecA as identified by NMR spectroscopy.** SecA residues interacting with the hydrophobic core of the synthetic signal peptide KRR-LamB are mapped in red onto *B. subtilis* SecA (left) and the *T. maritima* SecA-SecYEG complex (right) (*E. coli* residues: P228, M235, Y236, V239, I304, M305, L306). The position of the SecY pore is indicated by a yellow circle.



***T. maritima* SecG DNA sequence:**

ATGAAGACGTTTTTCCTAATCGTTCACACCATCATAAGCGTGGCTCTCATCTA  
CATGGTCCAGGTGCAGATGTCGAAATTCTCAGAGCTCGGTGGTGCCTTCGGA  
AGTGGAGGACTTCACACCGTTTTTGGGAAGAAGAAAAGCCTCGACACCGGTGG  
AAAGATCACTCTTGTCTGTCTGTACTCTTTTTTCGTTTCCTGCGTAGTAACAGC  
TTTCGTTCTAACGAGGTAA

***T. maritima* SecG protein sequence:**

MKTFFLIVHTIISVALIYMVQVQMSKFSELGGAFGSGGLHTVFGRRKGLDTGGKI  
TLVLSVLFFVSCVVTAFVLTR

**Figure S11| Nucleotide and amino acid sequence of *T. maritima* SecG.** The gene was PCR-amplified from genomic DNA (ATCC code 43589, DSM: 3109). The database entry for the *T. maritima* SecG gene has a nucleotide deletion after the Ala33 codon, resulting in a frame shift. The extra cytidine found in our sequence is highlighted in red.

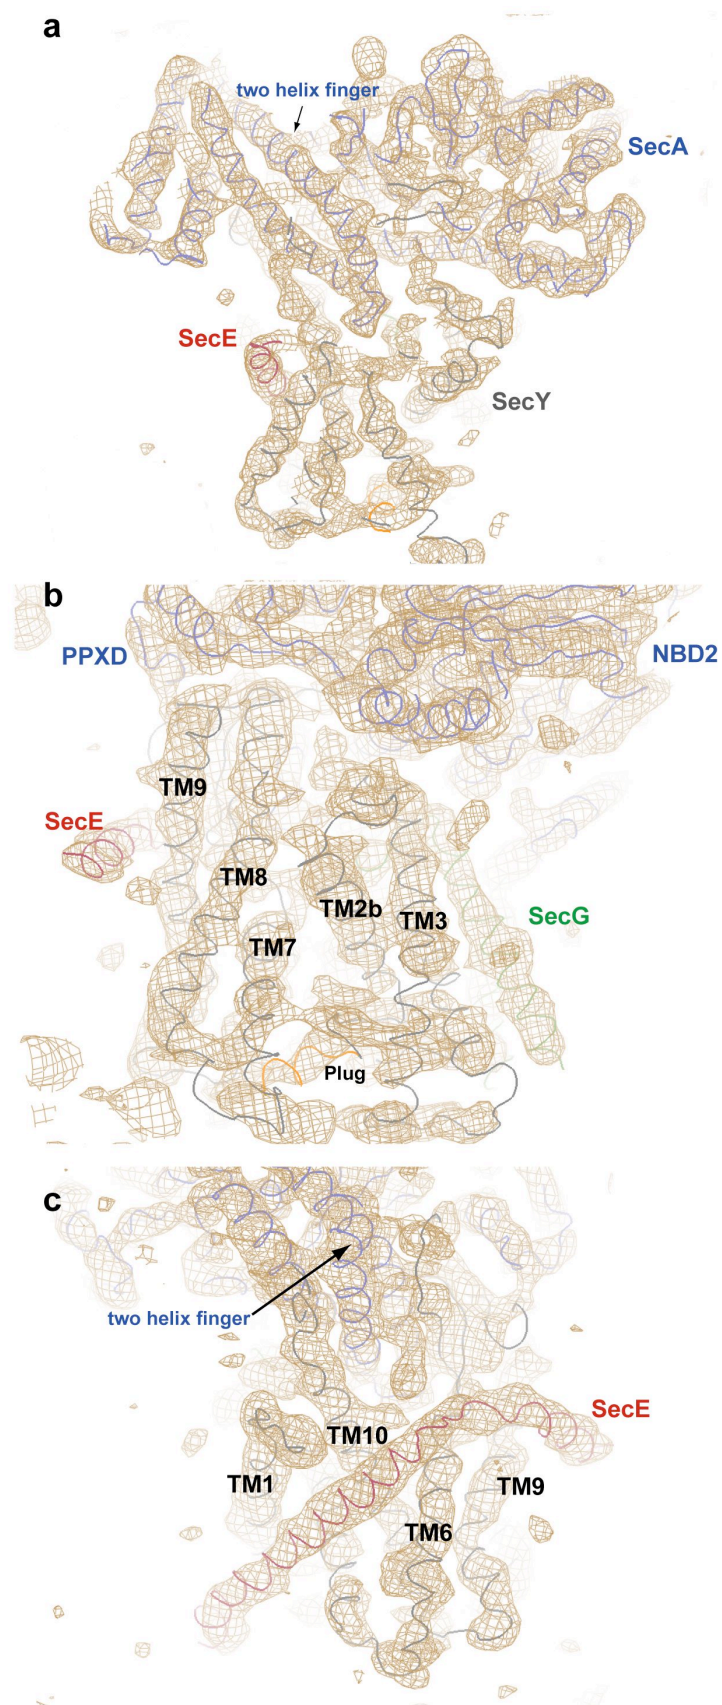

**Figure S12| Experimental electron density map for the *T. maritima* SecA-SecYEG complex.** The map was calculated at 4.5Å and contoured at 1.0 $\sigma$ . Experimental phases were derived from 11 Se-Met positions identified in SecY and SecG in an anomalous Fourier difference map and were refined by NCS averaging. **a**, Overview of the SecA-SecYEG complex; **b**, Close-up view on the lateral gate of SecY. **c**, 90° rotation of **b**. SecA is shown in blue, SecY in gray, SecE in red, and SecG in green. SecY's plug is shown in orange.
